# Supplementary material
Source: publisher site journal article supplement (https://www.dovepress.com/article/225791)
Supplement: Supplementary file 1 [file get_supplementary_file.php]

## Supplementary Materials

### Pt 1

| NO.  | Gender | Age | Weight (kg) | FBG (mmol/l) |
|------|--------|-----|-------------|--------------|
| DN1  | male   | 55  | 79          | 8.35         |
| DN2  | male   | 51  | 70          | 6.01         |
| DN3  | male   | 65  | 65          | 6.48         |
| DN4  | female | 56  | 72          | 8.15         |
| DN5  | female | 74  | 63          | 7.21         |
| DN6  | female | 49  | 82          | 8.57         |
| DN7  | female | 59  | 52          | 7.07         |
| DN8  | female | 74  | 62          | 5.59         |
| DN9  | male   | 65  | 88          | 6.68         |
| DN10 | female | 47  | 71          | 13.82        |
| DN11 | male   | 63  | 81          | 9.24         |
| DN12 | female | 78  | 48          | 16.09        |
| DN13 | female | 53  | 62          | 11.32        |
| DN14 | male   | 55  | 70          | 11.93        |
| DN15 | female | 30  | 65          | 12.37        |
| DN16 | female | 73  | 72          | 8.17         |
| DN17 | male   | 69  | 68          | 9.22         |
| DN18 | male   | 46  | 75          | 13.77        |
| DN19 | female | 76  | 55          | 9.45         |
| DN20 | male   | 36  | 60          | 5.23         |
| DN21 | male   | 51  | 51          | 8.29         |
| DN22 | female | 56  | 67          | 8.2          |
| DN23 | female | 75  | 50          | 5.64         |
| DN24 | female | 65  | 60          | 5.8          |
| DN25 | male   | 69  | 68          | 9.01         |
| DN26 | female | 79  | 54          | 8.17         |
| DN27 | female | 76  | 64          | 9.21         |
| DN28 | female | 50  | 58          | 7.37         |
| DN29 | male   | 65  | 72          | 7.41         |
| DN30 | female | 46  | 66          | 14.83        |

| PBG (mmol/l) | TG (mmol/l) | TC (mmol/l) | HDL-C (mmol/l) |
|--------------|-------------|-------------|----------------|
| 11.32        | 0.65        | 2.62        | 0.84           |
| 6.82         | 0.85        | 2.65        | 0.93           |
| 8.43         | 2.23        | 4.79        | 1.43           |
| 12.41        | 1.07        | 3.98        | 1.32           |
| 10.2         | 1.27        | 4.61        | 1.44           |
| 15.3         | 1.31        | 5.38        | 1.37           |
| 6.91         | 0.66        | 4.5         | 1.54           |
| 8.23         | 1.19        | 4.16        | 1.4            |
| 10.57        | 2.07        | 4.32        | 0.97           |
| 15.44        | 7.94        | 3.51        | 0.82           |
| 12.35        | 1.55        | 2.66        | 0.81           |
| 18.43        | 0.6         | 6.54        | 2.27           |
| 13.62        | 0.76        | 5.09        | 1.7            |
| 10.76        | 2.01        | 5.78        | 1.1            |
| 15.28        | 1.79        | 5.39        | 1.05           |
| 7.56         | 2.14        | 3.91        | 0.98           |
| 18.57        | 0.86        | 3.79        | 1.67           |
| 15.05        | 4.37        | 4.64        | 1.03           |
| 14.24        | 1.2         | 2.49        | 0.94           |
| 6.45         | 1.08        | 3.89        | 1.62           |
| 15.47        | 1.33        | 4.43        | 1.63           |
| 7.14         | 1.23        | 5.6         | 1.7            |
| 7.26         | 2.73        | 6.05        | 1.34           |
| 8.45         | 1.84        | 5.89        | 1.87           |
| 12.6         | 1.33        | 4.86        | 1.92           |
| 9.72         | 1.51        | 4.53        | 1.07           |
| 7.8          | 1.86        | 5.11        | 1.77           |
| 6.53         | 1.9         | 10.73       | 1.5            |
| 8.91         | 1.1         | 4.59        | 1.73           |
| 16.72        | 4.83        | 8.17        | 1.11           |

| LDL-C (mmol/l) | HBA1C (%) | Up/Ugcr (mg/g) |
|----------------|-----------|----------------|
| 1.6            | 7.3       | 820            |
| 1.58           | 6.4       | 1244           |
| 3.15           | 7.2       | 952            |
| 1.9            | 8.8       | 1140           |
| 2.39           | 7.9       | 1336           |
| 3.55           | 11.8      | 758            |
| 2.26           | 5.6       | 1246           |
| 2.05           | 7.7       | 1050           |
| 2.45           | 8.8       | 895            |
| 4.16           | 9.8       | 764            |
| 1.41           | 9.4       | 972            |
| 3.06           | 11.7      | 521            |
| 2.4            | 9.2       | 784            |
| 3.9            | 8.5       | 1421           |
| 3.73           | 13.2      | 449            |
| 2.45           | 6.9       | 1204           |
| 1.87           | 12.3      | 1425           |
| 2.95           | 9.3       | 521            |
| 1.37           | 10.5      | 1342           |
| 2.13           | 6.3       | 546            |
| 2.59           | 10.6      | 951            |
| 3.24           | 6.3       | 365            |
| 3.75           | 6.1       | 478            |
| 3.47           | 7         | 413            |
| 2.56           | 8.5       | 1358           |
| 2.9            | 7.9       | 924            |
| 3.06           | 6.3       | 618            |
| 7.94           | 5.7       | 1027           |
| 2.6            | 7         | 653            |
| 6.04           | 12.8      | 1178           |

## Pt 2

| NO. | Gender | Age | eight (kg) | FBG (mmol/l) | PBG (mmol/l) |
|-----|--------|-----|------------|--------------|--------------|
| C1  | male   | 38  | 80         | 5.24         | 6.81         |
| C2  | female | 29  | 56         | 4.82         | 6.24         |
| C3  | female | 38  | 50         | 4.91         | 5.93         |
| C4  | male   | 39  | 68         | 5.12         | 6.46         |
| C5  | male   | 36  | 75         | 5.02         | 6.24         |
| C6  | female | 49  | 62         | 5.2          | 6.73         |
| C7  | male   | 52  | 79         | 5.63         | 7.38         |
| C8  | female | 25  | 70         | 5.36         | 6.57         |
| C9  | female | 54  | 54         | 5.47         | 6.46         |
| C10 | female | 62  | 64         | 5.42         | 6.84         |
| C11 | female | 64  | 58         | 5.62         | 7.24         |
| C12 | female | 48  | 50         | 4.82         | 6.41         |
| C13 | female | 62  | 55         | 4.92         | 6.38         |
| C14 | male   | 28  | 75         | 5.13         | 6.57         |
| C15 | male   | 37  | 85         | 5.86         | 7.45         |
| C16 | male   | 49  | 75         | 5.42         | 6.98         |
| C17 | male   | 63  | 72         | 5.84         | 7.42         |
| C18 | male   | 29  | 85         | 5.62         | 6.9          |
| C19 | female | 40  | 60         | 5.31         | 5.98         |
| C20 | male   | 35  | 65         | 4.92         | 5.83         |
| C21 | female | 32  | 52         | 4.82         | 5.64         |
| C22 | male   | 34  | 75         | 5.43         | 6.76         |
| C23 | male   | 52  | 78         | 5.64         | 7.26         |
| C24 | female | 44  | 58         | 4.72         | 5.68         |
| C25 | male   | 58  | 75         | 5.34         | 6.85         |
| C26 | male   | 49  | 82         | 5.27         | 7.3          |
| C27 | female | 51  | 62         | 5.63         | 6.45         |
| C28 | female | 53  | 53         | 4.92         | 6.04         |
| C29 | male   | 42  | 71         | 5.38         | 6.86         |
| C30 | female | 45  | 58         | 5.03         | 6.57         |

| TG (mmol/l) | TC (mmol/l) | HDL-C (mmol/l) | LDL-C (mmol/l) | HBA1C (%) |
|-------------|-------------|----------------|----------------|-----------|
| 2.41        | 5.32        | 1.24           | 3.04           | 5.8       |
| 1.92        | 4.63        | 1.36           | 2.82           | 5.6       |
| 1.43        | 3.54        | 1.23           | 2.35           | 5.4       |
| 2.25        | 5.02        | 1.15           | 3.12           | 5.8       |
| 1.52        | 3.72        | 0.9            | 2.43           | 5.7       |
| 1.67        | 4.72        | 1.07           | 2.82           | 5.9       |
| 2.25        | 5.25        | 0.92           | 3.24           | 6         |
| 2.03        | 3.47        | 1.36           | 2.46           | 5.8       |
| 1.52        | 3.23        | 1.03           | 2.82           | 5.9       |
| 1.74        | 3.52        | 1.25           | 3.26           | 5.8       |
| 1.52        | 4.55        | 1.13           | 2.74           | 6         |
| 1.55        | 3.51        | 1.32           | 2.43           | 5.4       |
| 2.35        | 3.42        | 1.29           | 2.33           | 5.6       |
| 2.43        | 5.22        | 1.2            | 3.44           | 5.8       |
| 2.52        | 5.54        | 0.9            | 3.25           | 6         |
| 2.31        | 5.23        | 1.12           | 3.26           | 5.8       |
| 1.78        | 5.61        | 0.92           | 3.05           | 5.7       |
| 2.34        | 4.72        | 1.26           | 2.68           | 5.4       |
| 1.54        | 3.25        | 1.36           | 2.83           | 5.5       |
| 1.57        | 4.56        | 1.25           | 2.04           | 5.2       |
| 1.36        | 3.88        | 1.13           | 1.94           | 5.3       |
| 1.54        | 5.72        | 0.95           | 3.47           | 5.7       |
| 2.33        | 4.87        | 1.12           | 3.12           | 5.8       |
| 1.46        | 3.54        | 1.27           | 2.28           | 5.4       |
| 2.39        | 5.17        | 0.89           | 3.28           | 5.7       |
| 1.92        | 5.25        | 1.03           | 3.05           | 5.9       |
| 1.71        | 4.84        | 1.23           | 2.91           | 5.5       |
| 2.01        | 4.25        | 1.17           | 2.18           | 5.2       |
| 1.79        | 3.83        | 1.03           | 2.94           | 5.4       |
| 1.52        | 3.78        | 1.12           | 2.18           | 5.7       |

Up/Ugcr (mg/g)

10  
12  
10  
15  
12  
14  
17  
10  
20  
18  
20  
10  
16  
12  
18  
16  
22  
14  
12  
10  
13  
15  
22  
12  
18  
24  
16  
10  
17  
12
